# Supplementary material for: Fiber-based 3D nano-printed holography with individually phase-engineered remote points
Source: PubMed Central journal article supplement (PMC9719565; doi:10.1038/s41598-022-25380-2), 2022-12-03
Supplement: 41598_2022_25380_MOESM4_ESM.pdf [file 41598_2022_25380_MOESM4_ESM.pdf]

# Supporting Information

## Fiber-based 3D nano-printed holography with individually phase-engineered remote points

Malte Plidschun<sup>1</sup>, Matthias Zeisberger<sup>1</sup>, Jisoo Kim<sup>1,2</sup>, Torsten Wieduwilt<sup>1</sup>, and Markus A. Schmidt<sup>1,2,3,\*</sup>

<sup>1</sup>Leibniz Institute of Photonic Technology, Albert-Einstein-Str. 9, 07745 Jena, Germany

<sup>2</sup>Abbe Center of Photonics and Faculty of Physics, Friedrich-Schiller-University Jena, Max-Wien-Platz 1, 07743 Jena, Germany

<sup>3</sup>Otto Schott Institute of Materials Research (OSIM), Friedrich-Schiller-University Jena, Fraunhoferstr. 6, 07743 Jena, Germany

\*markus.schmidt@leibniz-ipht.de

### Overview of implemented holograms

**Table S1.** Considered scenarios of discrete 3D multi-focus holograms with different inter-focal distances  $\Lambda$  and in- and opposite-phase configurations.

| name of scenario     | number of foci | inter-focal distance [ $d_{\min}$ ] | phase symmetry | shown in Figure |
|----------------------|----------------|-------------------------------------|----------------|-----------------|
| linear dual-focus    | 2              | 2 (0.5 NA)                          | ↑↑             | 2a,i, 3a,e,i    |
|                      |                |                                     | ↑↓             | 2e,m            |
|                      |                | 4/3 (0.5 NA)                        | ↑↑             | 2b,j            |
|                      |                |                                     | ↑↓             | 2f,n            |
|                      |                | 2/3 (0.5 NA)                        | ↑↑             | 2c,k, 3b,f,j    |
|                      |                |                                     | ↑↓             | 2g,o, 3c,g,k    |
| circular multi-focus | 8              | 2 (0.5 NA)                          | ↑↑             | 4a,e,i          |
|                      | 16             | 4/3 (0.5 NA)                        | ↑↑             | 4b,f,j          |
|                      |                |                                     | ↑↓             | 4c,g,k          |
|                      | 32             | 2/3 (0.5 NA)                        | ↑↓             | 4d,h,l          |

|                      |     |                |    |      |
|----------------------|-----|----------------|----|------|
| 3D fiber multi-focus | 192 | 2.5 (mixed NA) | ↑↑ | 5    |
|                      | 142 | (0.6 NA)       | ↑↑ | 5c,d |
|                      | 50  | (0.4 NA)       | ↑↑ | 5e,f |

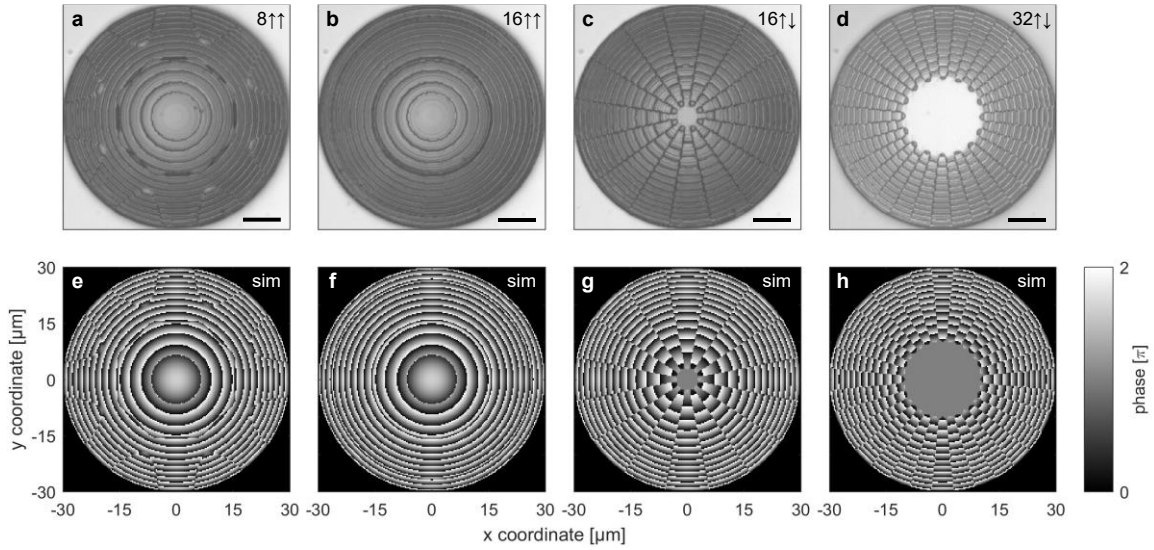

**Figure S1.** (a)–(d) Selected examples of implemented holograms and (e)–(h) simulated phase distributions in the aperture plane for the situation where a discrete number of foci are located on an annulus of circumference  $C = 16 d_{\min}$ . Each column refers to a different configuration (from left to right): (a), (e)  $N = 8$ ,  $\lambda = 2 d_{\min}$ , ↑↑; (b), (f)  $N = 16$ ,  $\lambda = 4/3 d_{\min}$ , ↑↑; (c), (g)  $N = 16$ ,  $\lambda = 4/3 d_{\min}$  ↑↓; (d), (h)  $N = 32$ ,  $\lambda = 2/3 d_{\min}$ , ↑↓. The scale bars in the top row refer to 10  $\mu\text{m}$ .

## Focus fields in the $xz$ -plane

As a complement to the intensity distributions of the dual focus arrangements in the  $xy$ -plane which are shown in Fig. 2 (i-k, m-o) the related distributions in the  $xz$ -plane are shown in Fig. S2.

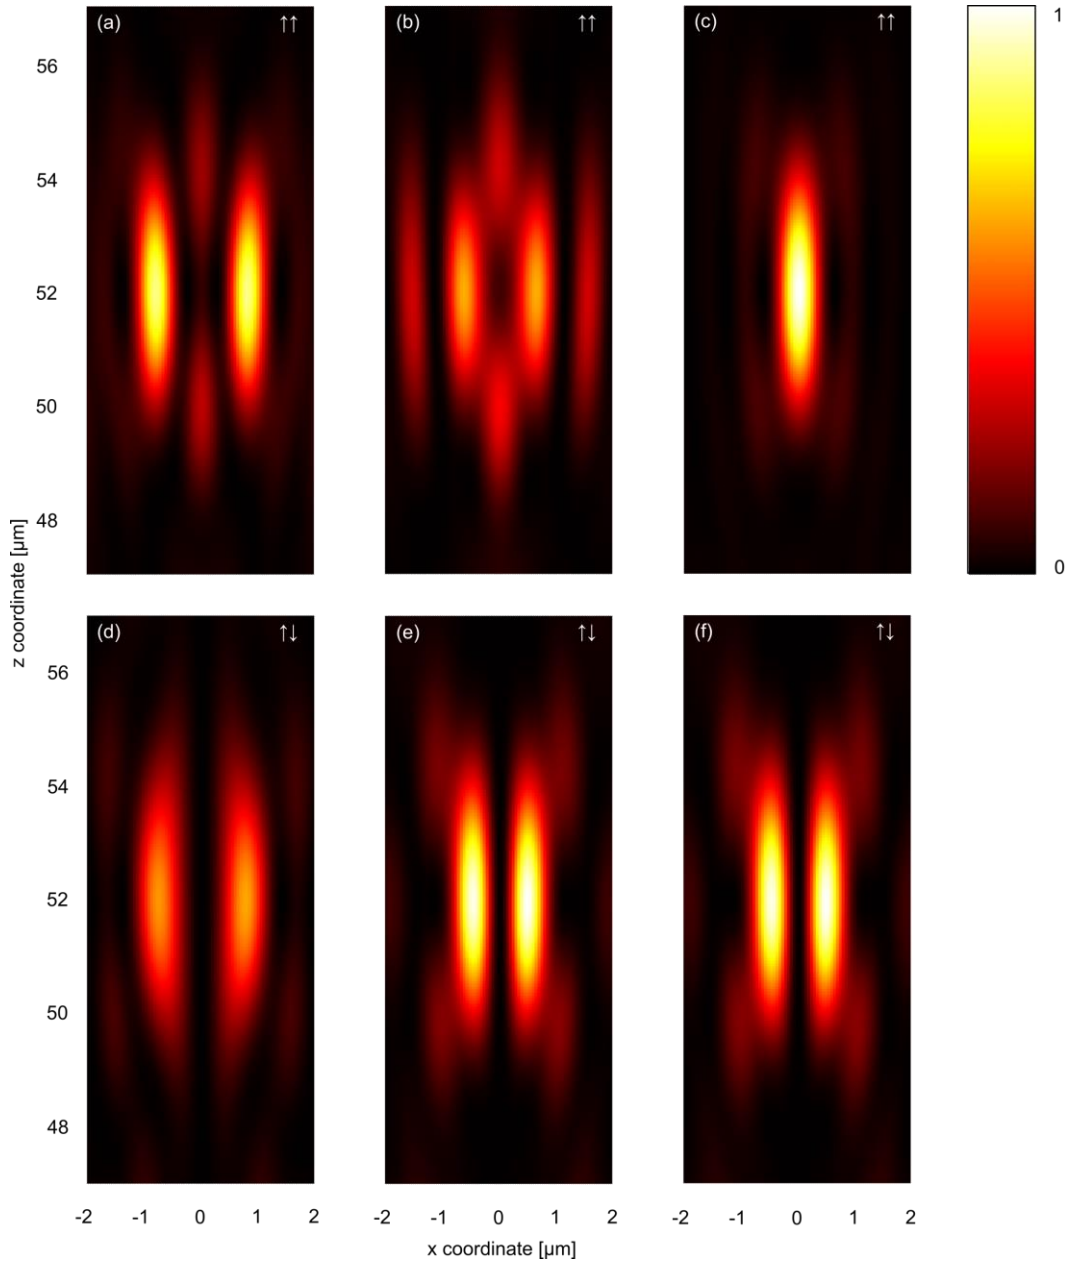

**Figure S2.** Comparison of simulated intensity distributions in the  $xz$ -plane near the axial focal distance ( $f=52 \mu\text{m}$ ) for the situation of two foci ( $N=2$ ). The designed lateral distances between the two foci are  $\Delta = 2 d_{\min}$  (a,d),  $\Delta = 4/3 d_{\min}$  (b,e), and  $\Delta = 2/3 d_{\min}$  (c, f). The upper row (a-c) shows the result for the foci being in phase ( $\uparrow\uparrow$ ), the lower row for the out of phase ( $\uparrow\downarrow$ ) case. Intensities are normalized in the same way as in Fig. 2 of the main text.

## Focal shift to larger radii

All configurations presented in Fig. 4 of the main text were designed using Eq. (1) to have the foci located on a circle of radius  $r = 2 \mu\text{m}$  in the focal plane. The simulation and the measurements of the associated intensity distributions correspond well to this design parameter for  $N = 8$  and  $N = 16$  foci. For  $N = 32$  foci with alternating phases, however, the foci are shifted to much larger radii of  $r = 4 \mu\text{m}$ . To understand this effect in more detail, we performed simulations for several numbers of foci between  $N = 16$  and  $N = 32$  in the in- and opposite-phase configuration. All other parameters are identical to those previously used. The results are presented in Fig. 7.

For the in-phase scenario, the data clearly shows that the foci are merging but are still located approximately at the designed radius of  $r = 2 \mu\text{m}$ . In the opposite-phase configuration, however, the foci are gradually shifted to larger radii with increasing  $N$ . Figure 7u shows the radial positions for the different cases, and Figure 7v shows the inter-focal distance of adjacent foci in units of the resolution limit  $d_{\min} = 777 \text{ nm}$ .

It is remarkable to note that for the opposite-phase configurations, the inter-focal distance always corresponds to approximately  $d_{\min}$ . Our interpretation of this effect is as follows: For  $N > 16$ , the inter-focal distance  $d$  of adjacent foci at radius  $r = 2 \mu\text{m}$  is  $d < d_{\min}$ . In the in-phase configuration, this leads to a merging of the foci into one circular focus. However, in the opposite-phase scenario, such a small distance of foci with opposite phases results in destructive interference. This leads to a shift of the foci to larger radii where they are still well separated ( $d \cong d_{\min}$ ).

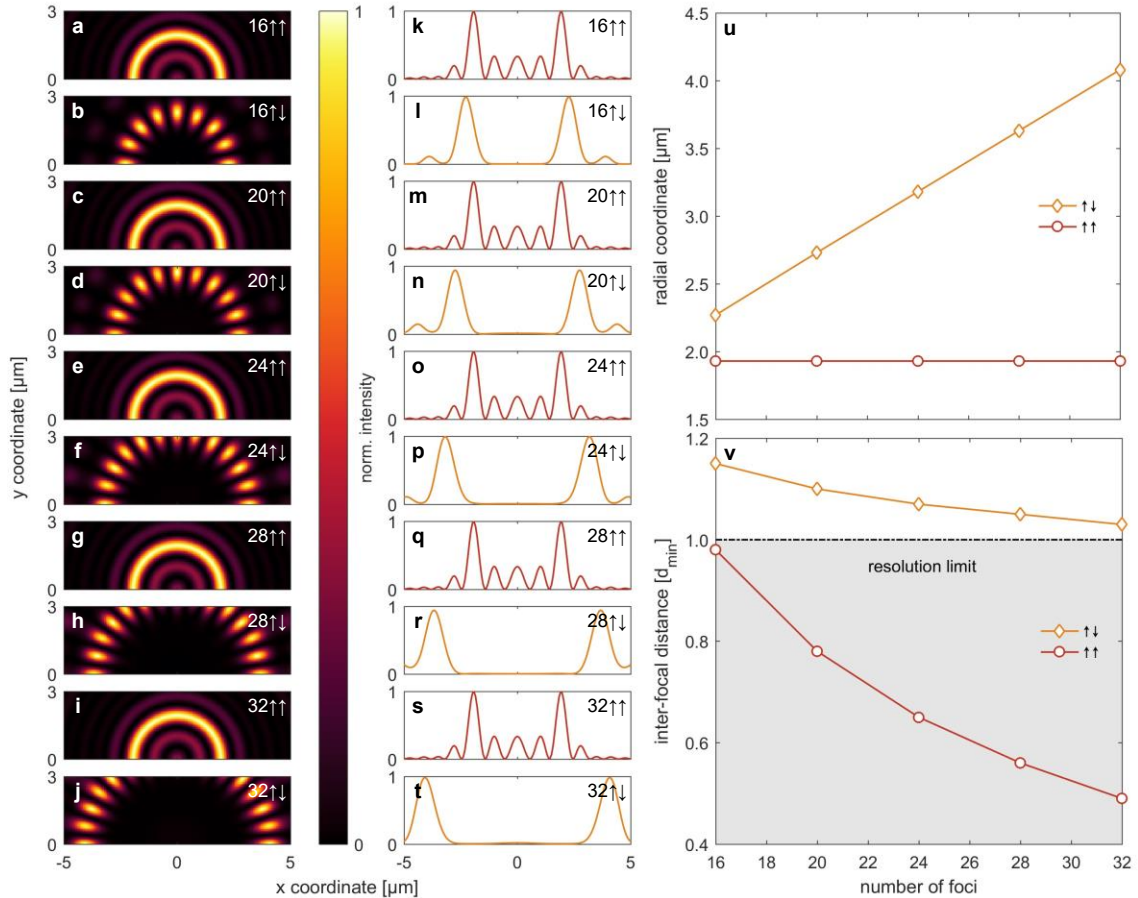

**Figure S3.** (a)–(j) Simulated intensity distribution within a cut-out of the  $xy$ -plane at focal distance ( $z = f$ ) for several numbers  $N = 20 \dots 32$  of foci in the in- and opposite-phase configuration and (k)–(t) intensity along a line at  $y = 0$ . (u) Radial positions of the foci and (v) inter-focal distances of adjacent foci in units of the resolution limit  $d_{\min} = 777 \text{ nm}$  for the different scenarios.
